# Supplementary material for: A spherical poly(acrylic acid) brush–enzyme block with high catalytic capacity for signal amplification in digital biological assays
Source: Royal Society of Chemistry journal article supplement (doi:10.1039/c9ra03404h), 2019-01-01
Supplement: c9ra03404h1.pdf [file c9ra03404h1.pdf]

# Supporting Information

## A spherical poly(acrylic acid) brush-enzymes block with high catalytic capacity for signal amplification in digital biological assays

Yibei Wang<sup>a</sup>, Zehang Gao<sup>b,c,d</sup>, Jingwei Yi<sup>a</sup>, Hongbo Zhou<sup>b</sup>, Xiaoxia Fang<sup>a</sup>, Hong  
Xu<sup>\*a</sup> and Jianlong Zhao<sup>b</sup>, Hongchen Gu<sup>\*a</sup>

### AUTHOR INFORMATION

\*Corresponding Author: School of Biomedical Engineering, Med-X Research Institute,  
Shanghai Jiao Tong University, Shanghai 200030, PR China

E-mail: [xuhong@sjtu.edu.cn](mailto:xuhong@sjtu.edu.cn)

[hcg@sjtu.edu.cn](mailto:hcg@sjtu.edu.cn)

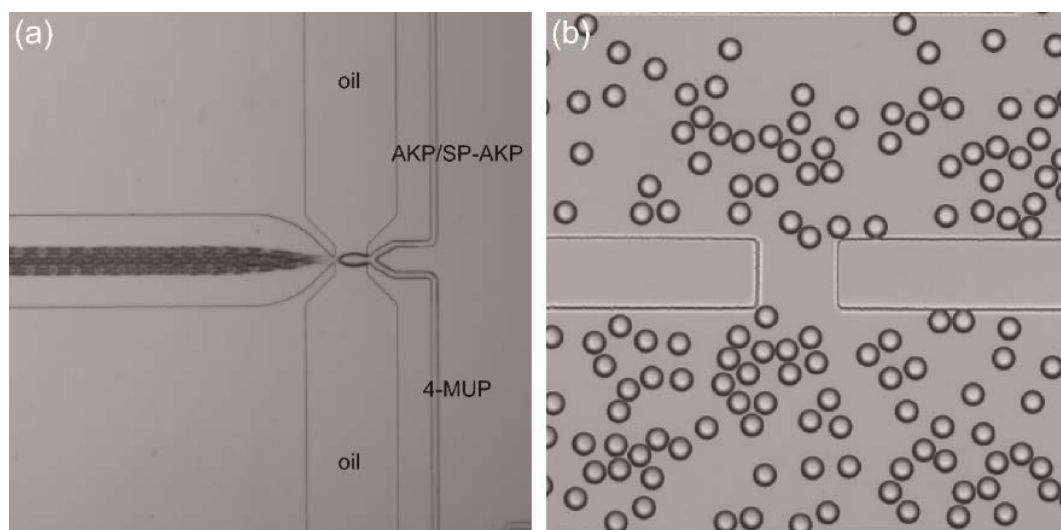

**Figure S1. (a) The generation (two water phase and two oil phases, 4 times magnification) and (b) the storage state (10 times magnification) of the droplets in the bright field.**

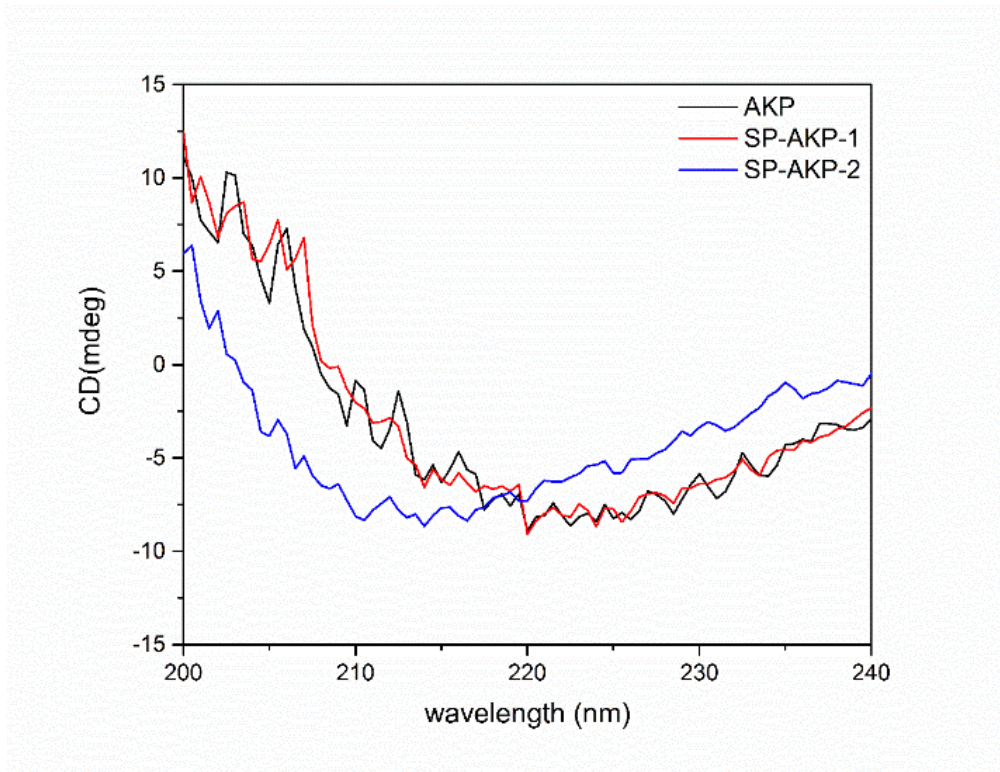

**Figure S2. The circular dichroism (CD) spectra of free AKP, SP-AKP-1 (by Electrostatic adsorbed), SP-AKP-2 (by CCEE method).**

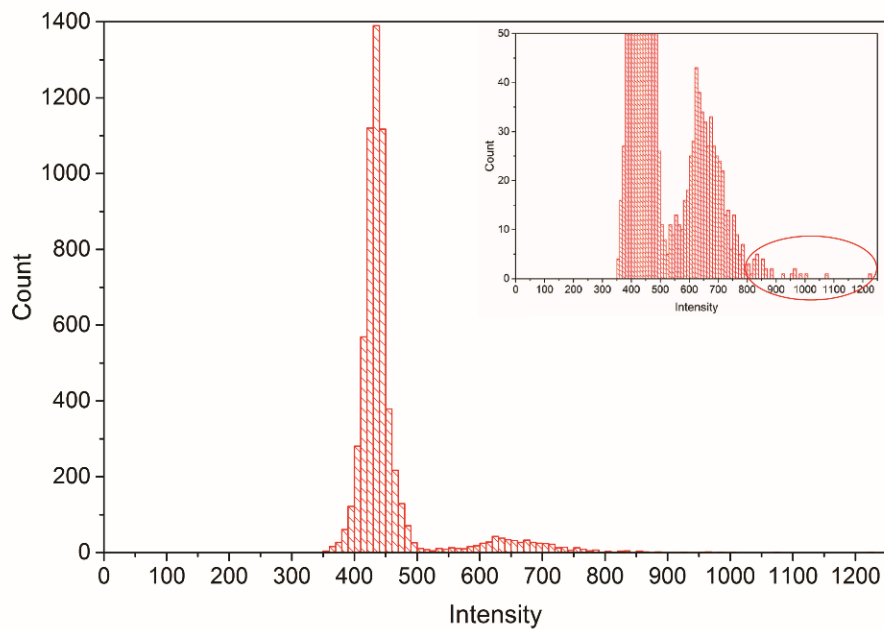

**Figure S3. Statistical diagram of fluorescence intensity distribution of SP-AKP (the plot shown in the inset is an expanded view to show the presence of low number of droplets with high intensities).**

**Table S1. Number and mean fluorescence intensity of droplets.**

|                                | X=0    | X=1    | X $\geq$ 2 |
|--------------------------------|--------|--------|------------|
| Number                         | 5550   | 517    | 29         |
| Mean FL intensity <sup>a</sup> | 434.09 | 653.28 | 886.31     |
| P(X)                           | 91.04% | 8.48%  | 0.48%      |
| The actual $\lambda$           | 0.0939 |        |            |

<sup>a</sup> Grey value, measured by Metamorph image analysis software.
